# Supplementary material for: Controlled release of precipitating agents through solvothermal destabilization of microemulsions: one-pot synthesis of monoclinic zirconia nanostructures
Source: Royal Society of Chemistry journal article supplement (doi:10.1039/b617214h), 2007-01-01

**SUPPORTING INFORMATION FOR:**

**Controlled release of precipitating agents through solvothermal destabilization of microemulsions: One-pot synthesis of monoclinic zirconia nanostructures.**

Pedro Tartaj,\* Oscar Bomati-Miguel, Aldo F. Rebolledo and Teresa Valdes-Solis.

Instituto de Ciencia de Materiales de Madrid, CSIC, Campus Universitario de Cantoblanco, 28049, Madrid (Spain)

E-mail: [ptartaj@icmm.csic.es](mailto:ptartaj@icmm.csic.es); Fax: +34 91 3720623; Tel.: +34 91 3348984

Keywords: Microemulsion, monoclinic zirconia, tetragonal zirconia, nanoflowers, dendrimers, mesocrystals, solvothermal, porosity, SOFC, hierarchy, phase stability.

**Figure S1: IR spectrum of a sample obtained by solvothermally controlled destabilization at 125 °C of microemulsions containing 64  $\mu\text{L}$  of 7.5 M  $\text{NH}_4\text{OH}$  aqueous dispersions in 2 mL of 0.5M  $\text{ZrOCl}_2$  aqueous solutions. The spectrum only displays bands associated with monoclinic zirconia and water. No signatures of the presence of surfactants are detected.**

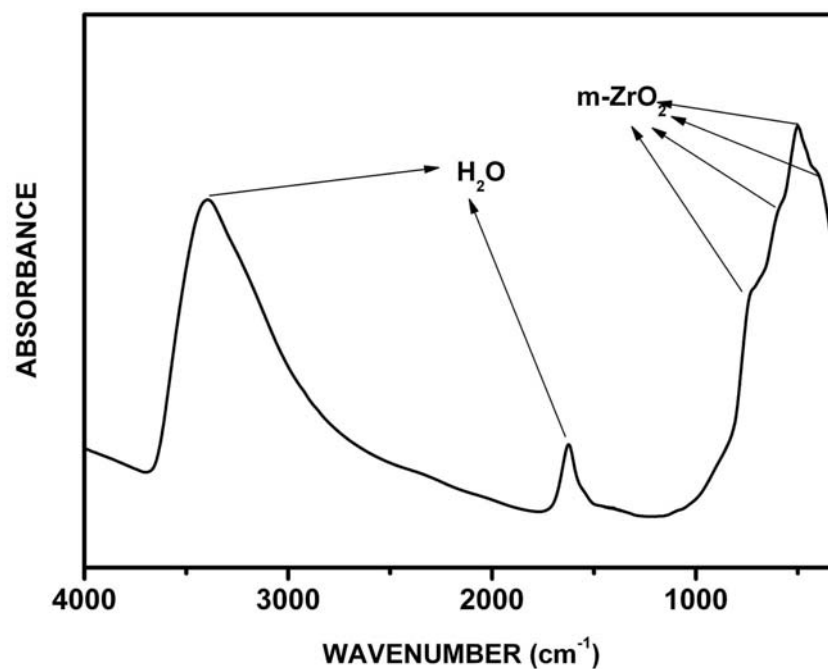

Supplement: b617214h.pdf [file b617214h.pdf]
